# Supplementary material for: A QSAR model for predicting the corneal permeability of drugs – the application of the Monte Carlo optimization method
Source: Royal Society of Chemistry journal article supplement (doi:10.1039/d2nj04301g), 2022-11-21
Supplement: d2nj04301g1.pdf [file d2nj04301g1.pdf]

Supplementary material

QSAR modeling of corneal permeability of drugs – the application of Monte Carlo optimization method

Maja Zivkovic<sup>1</sup>, Marko Zlatanovic<sup>1</sup>, Nevena Zlatanovic<sup>2</sup>, Mladjan Golubović<sup>3</sup>, Aleksandar M. Veselinović<sup>4\*</sup>

<sup>1</sup>Medical Faculty, Department of Ophthalmology, University of Nis, Nis, Serbia

<sup>2</sup>Community Health center Nis, Nis, Serbia

<sup>3</sup>Clinic for anesthesiology and intensive care, Clinical Center Nis, Nis, Serbia

<sup>4</sup>Faculty of Medicine, Department of Chemistry, University of Nis, Nis, Serbia

\*Corresponding author:

Aleksandar M. Veselinović,

Faculty of Medicine, Department of Chemistry, University of Niš,

Bulevar Dr Zorana Đinđića 81, 18000 Niš, Serbia

Fax: +381 18 4238770; Phone: +381 18 4570029

E-mail: [aveselinovic@medfak.ni.ac.rs](mailto:aveselinovic@medfak.ni.ac.rs)

Table S1. The SMILES notation of the studied molecules, calculated values for the DCW, experimental data (Ac) – Expr, the values of Ac calculated with the application of CORAL software – Calc, the difference between Expr and Calc – Diff for the built QSPR model.

| SMILES notation | Expr                                                 | Split 1 |          |         |         | Split 2 |          |         |         | Split 3 |          |         |         |    |
|-----------------|------------------------------------------------------|---------|----------|---------|---------|---------|----------|---------|---------|---------|----------|---------|---------|----|
|                 |                                                      | DCW     | Calc     | Diff    | Set     | DCW     | Calc     | Diff    | Set     | DCW     | Calc     | Diff    | Set     |    |
| 1               | <chem>CC(=O)Nc1nnc(s1)S(=O)(=O)N</chem>              | -6.04   | 0.19311  | -6.0385 | -0.0015 | Ts      | 19.85779 | -6.1291 | 0.0891  | Tr      | -1.45422 | -6.1922 | 0.1522  | Tr |
| 2               | <chem>C=CCc1cccc1OCC(CNC(C)C)O</chem>                | -4.54   | 66.86635 | -4.3186 | -0.2214 | Tr      | 76.99438 | -4.4167 | -0.1233 | Tr      | 44.06187 | -4.58   | 0.04    | Ts |
| 3               | <chem>OC(COc1ccc(cc1)CC(=O)N)CNC(C)C</chem>          | -6.17   | 20.51512 | -5.5143 | -0.6557 | Tr      | 29.64402 | -5.8358 | -0.3342 | Tr      | 17.28472 | -5.5285 | -0.6415 | Ts |
| 4               | <chem>O=S(=O)(c1cccc1)Nc1nnc(s1)S(=O)(=O)N</chem>    | -6.85   | -9.49742 | -6.2885 | -0.5615 | Ts      | -5.49106 | -6.8888 | 0.0388  | Tr      | -11.4317 | -6.5456 | -0.3044 | Ts |
| 5               | <chem>COc1cc(CCNCC(CO2cccc(c2)C)O)ccc1OC</chem>      | -4.27   | 72.22556 | -4.1803 | -0.0897 | Tr      | 82.6559  | -4.247  | -0.023  | Tr      | 60.77589 | -3.988  | -0.282  | Tr |
| 6               | <chem>CC(=O)N(c1nnc(s1)S(=O)(=O)N)Br</chem>          | -6.42   | -0.21864 | -6.0491 | -0.3709 | Ts      | 10.39161 | -6.4128 | -0.0072 | Tr      | -2.62511 | -6.2337 | -0.1863 | Tr |
| 7               | <chem>CCc1cccc2c1oc(c2)C(CNC(C)C)C)O</chem>          | -4.24   | 71.85127 | -4.19   | -0.05   | Tr      | 86.70648 | -4.1256 | -0.1144 | Tr      | 50.53906 | -4.3506 | 0.1106  | Tr |
| 8               | <chem>Clc1cccc1c1nnc(s1)S(=O)(=O)N</chem>            | -4.74   | 66.80806 | -4.3201 | -0.4199 | Tr      | 74.76417 | -4.4835 | -0.2565 | Tr      | 34.06971 | -4.9339 | 0.1939  | Ts |
| 9               | <chem>Clc1cccc(c1NC1=NCCN1)Cl</chem>                 | -4.51   | 56.72623 | -4.5802 | 0.0702  | Tr      | 69.76663 | -4.6333 | 0.1233  | Ts      | 39.82207 | -4.7302 | 0.2202  | Tr |
| 11              | <chem>C1CCN(P1(=O)NCCCO1)CCCl</chem>                 | -4.96   | 29.33495 | -5.2868 | 0.3268  | Ts      | 55.52814 | -5.06   | 0.1     | Ts      | 30.37475 | -5.0648 | 0.1048  | Tr |
| 12              | <chem>CCOc1ccc2c(c1)sc(n2)S(=O)(=O)N</chem>          | -4.25   | 47.9722  | -4.806  | 0.556   | Tr      | 71.85739 | -4.5706 | 0.3206  | Ts      | 36.23585 | -4.8572 | 0.6072  | Tr |
| 13              | <chem>NS(=O)(=O)c1nc2c(s1)cccc2</chem>               | -4.44   | 53.17064 | -4.6719 | 0.2319  | Ts      | 71.26807 | -4.5883 | 0.1483  | Tr      | 40.2906  | -4.7136 | 0.2736  | Tr |
| 14              | <chem>Oc1ccc2c(c1)sc(n2)S(=O)(=O)N</chem>            | -5.25   | 39.63465 | -5.0211 | -0.2289 | Ts      | 47.22552 | -5.3089 | 0.0589  | Tr      | 27.82316 | -5.1552 | -0.0948 | Tr |
| 15              | <chem>Clc1ccc2c(c1)sc(n2)S(=O)(=O)N</chem>           | -4.37   | 67.58364 | -4.3001 | -0.0699 | Tr      | 76.47008 | -4.4324 | 0.0624  | Tr      | 51.9525  | -4.3005 | -0.0695 | Tr |
| 16              | <chem>Clc1cc(Cl)c2c(c1)sc(n2)S(=O)(=O)N</chem>       | -4.41   | 54.43009 | -4.6394 | 0.2294  | Tr      | 76.29683 | -4.4376 | 0.0276  | Tr      | 47.60108 | -4.4547 | 0.0447  | Tr |
| 17              | <chem>Nc1ccc2c(c1)sc(n2)S(=O)(=O)N</chem>            | -5.17   | 37.11758 | -5.086  | -0.084  | Tr      | 45.8739  | -5.3494 | 0.1794  | Ts      | 24.71838 | -5.2652 | 0.0952  | Tr |
| 18              | <chem>[O-][N+](=O)c1ccc2c(c1)sc(n2)S(=O)(=O)N</chem> | -5.18   | 32.37731 | -5.2083 | 0.0283  | Tr      | 55.56161 | -5.059  | -0.121  | Tr      | 21.3703  | -5.3837 | 0.2037  | Tr |
| 19              | <chem>OCCOc1ccc2c(c1)sc(n2)S(=O)(=O)N</chem>         | -5.82   | 27.74422 | -5.3278 | -0.4922 | Tr      | 57.80403 | -4.9918 | -0.8282 | Tr      | 28.12437 | -5.1445 | -0.6755 | Tr |
| 20              | <chem>c1ccc(cc1)COc1ccc2c(c1)scn2</chem>             | -4.33   | 56.07864 | -4.5969 | 0.2669  | Ts      | 89.81447 | -4.0324 | -0.2976 | Tr      | 45.14302 | -4.5417 | 0.2117  | Ts |
| 21              | <chem>CC(=O)Nc1ccc2c(c1)scn2</chem>                  | -5.33   | 34.4589  | -5.1546 | -0.1754 | Tr      | 53.16071 | -5.131  | -0.199  | Ts      | 30.82577 | -5.0488 | -0.2812 | Tr |
| 22              | <chem>OC(COc1ccc2c1CC2=O)CNC(C)C)C</chem>            | -4.7    | 46.19212 | -4.8519 | 0.1519  | Tr      | 63.49704 | -4.8212 | 0.1212  | Tr      | 41.9689  | -4.6541 | -0.0459 | Tr |
| 23              | <chem>CC(CCc1cccc1)NCC(c1ccc(c1)C(=O)N)O)O</chem>    | -4.85   | 36.66973 | -5.0975 | 0.2475  | Tr      | 55.69393 | -5.0551 | 0.2051  | Tr      | 28.28305 | -5.1389 | 0.2889  | Tr |

|    |                                               |       |          |         |         |    |          |         |         |    |          |         |         |    |
|----|-----------------------------------------------|-------|----------|---------|---------|----|----------|---------|---------|----|----------|---------|---------|----|
| 24 | CC(=O)N=c1sc(nn1C)S(=O)(=O)N                  | -5.59 | 17.92792 | -5.581  | -0.009  | Ts | 30.89194 | -5.7984 | 0.2084  | Tr | 11.75755 | -5.7242 | 0.1342  | Ts |
| 25 | N=c1sc(nn1C)S(=O)(=O)N                        | -6.11 | -1.2997  | -6.077  | -0.033  | Tr | 20.00129 | -6.1248 | 0.0148  | Tr | 10.30364 | -5.7757 | -0.3343 | Ts |
| 26 | COCCc1ccc(cc1)OCC(CNC(C)C)O                   | -4.6  | 50.09122 | -4.7513 | 0.1513  | Ts | 68.03703 | -4.6851 | 0.0851  | Tr | 41.59758 | -4.6673 | 0.0673  | Tr |
| 27 | OC(COc1ccc2c1CC(O)C(C2)O)CNC(C)C              | -6    | 17.94811 | -5.5805 | -0.4195 | Ts | 31.74672 | -5.7728 | -0.2272 | Ts | 7.67518  | -5.8688 | -0.1312 | Tr |
| 28 | C=CCOc1ccc1OCC(CNC(C)C)O                      | -4.54 | 58.36796 | -4.5378 | -0.0022 | Ts | 72.48199 | -4.5519 | 0.0119  | Tr | 36.81994 | -4.8365 | 0.2965  | Ts |
| 29 | OC(COc1ccc1C1CCCC1)CNC(C)C                    | -4.35 | 66.31888 | -4.3327 | -0.0173 | Tr | 80.04353 | -4.3253 | -0.0247 | Ts | 59.94217 | -4.0175 | -0.3325 | Tr |
| 30 | CNCC(c1ccc(c1)O)O                             | -6.03 | 0.32585  | -6.0351 | 0.0051  | Tr | 27.98942 | -5.8854 | -0.1446 | Tr | 1.97838  | -6.0706 | 0.0406  | Tr |
| 31 | OC(COc1ccc2c1cc[nH]2)CNC(C)C                  | -5    | 43.31456 | -4.9261 | -0.0739 | Ts | 52.77625 | -5.1425 | 0.1425  | Tr | 38.42964 | -4.7795 | -0.2205 | Ts |
| 32 | OC(COc1ccc2c1ccc2)CNC(C)C                     | -4.32 | 67.34634 | -4.3062 | -0.0138 | Tr | 74.46341 | -4.4925 | 0.1725  | Tr | 46.59454 | -4.4903 | 0.1703  | Tr |
| 33 | CCC1C2CC3N(C1O)C1C2C(O)C2(C3N(C)c3c2ccc3)C1   | -5.04 | 36.24255 | -5.1086 | 0.0686  | Tr | 53.05794 | -5.1341 | 0.0941  | Tr | 30.37402 | -5.0648 | 0.0248  | Tr |
| 34 | C1NCCc2c1c1nnc1cc2                            | -4.1  | 77.61521 | -4.0413 | -0.0587 | Tr | 88.01274 | -4.0864 | -0.0136 | Tr | 56.65357 | -4.134  | 0.034   | Tr |
| 35 | CN1CCc2c(CC1)ccc2C1                           | -4.15 | 79.76128 | -3.9859 | -0.1641 | Tr | 82.56097 | -4.2498 | 0.0998  | Tr | 56.22932 | -4.149  | -0.001  | Ts |
| 36 | COc1ccc(c2c1CNCC2)OC                          | -4.31 | 64.8508  | -4.3706 | 0.0606  | Tr | 73.52686 | -4.5206 | 0.2106  | Tr | 46.76162 | -4.4844 | 0.1744  | Tr |
| 37 | CC(NCC(c1ccc(cc1)NS(=O)(=O)C)O)C              | -5.8  | 10.98677 | -5.7601 | -0.0399 | Tr | 32.74071 | -5.743  | -0.057  | Ts | 24.8006  | -5.2622 | -0.5378 | Ts |
| 38 | CNS(=O)(=O)c1ccc(cc1)Cl                       | -4.19 | 60.52976 | -4.482  | 0.292   | Tr | 80.04832 | -4.3251 | 0.1351  | Tr | 50.25512 | -4.3607 | 0.1707  | Tr |
| 39 | Cc1ccc(cc1)S(=O)(=O)N                         | -4.26 | 64.74029 | -4.3734 | 0.1134  | Tr | 66.42765 | -4.7334 | 0.4734  | Tr | 52.54871 | -4.2794 | 0.0194  | Tr |
| 40 | NS(=O)(=O)c1nn2c(s1)nsc2=Ne1ccc1              | -5.1  | 34.04838 | -5.1652 | 0.0652  | Tr | 65.39563 | -4.7643 | -0.3357 | Tr | 33.96997 | -4.9375 | -0.1625 | Tr |
| 41 | Clc1ccc(c1)N=c1snc2n1nc(s2)S(=O)(=O)N         | -4.89 | 42.69284 | -4.9422 | 0.0522  | Tr | 62.45134 | -4.8525 | -0.0375 | Ts | 42.22895 | -4.6449 | -0.2451 | Tr |
| 42 | Clc1ccc(cc1)N=c1snc2n1nc(s2)S(=O)(=O)N        | -5.08 | 42.78846 | -4.9397 | -0.1403 | Tr | 59.3523  | -4.9454 | -0.1346 | Tr | 29.08384 | -5.1105 | 0.0305  | Tr |
| 43 | COc1ccc(c1)N=c1snc2n1nc(s2)S(=O)(=O)N         | -5.35 | 28.60326 | -5.3056 | -0.0444 | Tr | 44.26371 | -5.3976 | 0.0476  | Tr | 18.21191 | -5.4956 | 0.1456  | Tr |
| 44 | COc1ccc(cc1)N=c1snc2n1nc(s2)S(=O)(=O)N        | -5.28 | 23.18862 | -5.4453 | 0.1653  | Ts | 40.39162 | -5.5137 | 0.2337  | Ts | 18.0572  | -5.5011 | 0.2211  | Ts |
| 45 | Oc1ccc(cc1)N=c1snc2n1nc(s2)S(=O)(=O)N         | -6.46 | 15.97544 | -5.6314 | -0.8286 | Ts | 24.53571 | -5.9889 | -0.4711 | Tr | 5.65051  | -5.9405 | -0.5195 | Tr |
| 46 | Fc1ccc(c1)N=c1snc2n1nc(s2)S(=O)(=O)N          | -5.19 | 21.93295 | -5.4777 | 0.2877  | Tr | 47.02338 | -5.3149 | 0.1249  | Tr | 27.05966 | -5.1822 | -0.0078 | Tr |
| 47 | Fc1ccc(cc1)N=c1snc2n1nc(s2)S(=O)(=O)N         | -5.39 | 23.03353 | -5.4493 | 0.0593  | Tr | 41.64237 | -5.4762 | 0.0862  | Tr | 15.27545 | -5.5996 | 0.2096  | Tr |
| 48 | CN(c1ccc(cc1)N=c1snc2n1nc(s2)S(=O)(=O)N)C     | -5.24 | 28.74932 | -5.3019 | 0.0619  | Tr | 38.22823 | -5.5785 | 0.3385  | Tr | 16.39986 | -5.5598 | 0.3198  | Tr |
| 49 | OC(COc1nsc1N1CCOCC1)CNC(C)C                   | -4.92 | 35.94295 | -5.1163 | 0.1963  | Tr | 56.63792 | -5.0268 | 0.1068  | Ts | 33.08174 | -4.9689 | 0.0489  | Tr |
| 50 | CC(=O)N=c1sc(nn1C(Cl)(Cl)Cl)S(=O)(=O)N        | -4.96 | 48.61134 | -4.7895 | -0.1705 | Tr | 58.61531 | -4.9675 | 0.0075  | Tr | 35.59987 | -4.8797 | -0.0803 | Tr |
| 51 | CC(=O)N=c1sc(nn1C(F)(F)F)S(=O)(=O)N           | -5.41 | 28.63149 | -5.3049 | -0.1051 | Ts | 40.80137 | -5.5014 | 0.0914  | Ts | 22.9651  | -5.3273 | -0.0827 | Ts |
| 52 | COC(=O)C1C(O)CCC2C1CC1N(C2)CCc2c1[nH]c1c2ccc1 | -4.74 | 56.87182 | -4.5764 | -0.1636 | Tr | 64.10721 | -4.8029 | 0.0629  | Ts | 42.58807 | -4.6322 | -0.1078 | Tr |
| 53 | CCn1nc(C(=O)O)c(=O)c2c1cc1OCoc1c2             | -5.82 | 18.68552 | -5.5615 | -0.2585 | Tr | 29.66104 | -5.8353 | 0.0153  | Tr | 9.52373  | -5.8033 | -0.0167 | Tr |
| 54 | CCn1cc(C(=O)O)c(=O)c2c1nc(C)cc2               | -4.77 | 43.82398 | -4.913  | 0.143   | Tr | 60.97123 | -4.8969 | 0.1269  | Ts | 28.23791 | -5.1405 | 0.3705  | Ts |

|    |                                                                     |       |          |         |         |    |          |         |         |    |          |         |         |    |
|----|---------------------------------------------------------------------|-------|----------|---------|---------|----|----------|---------|---------|----|----------|---------|---------|----|
| 55 | <chem>CCn1cc(C(=O)O)c(=O)e2e1nc(N1CCNCC1)c(e2)F</chem>              | -5.77 | 13.23596 | -5.7021 | -0.0679 | Tr | 40.56275 | -5.5085 | -0.2615 | Ts | 15.36713 | -5.5964 | -0.1736 | Tr |
| 56 | <chem>CCn1cc(C(=O)O)c(=O)e2e1cc(N1CCNCC1)c(e2)F</chem>              | -5.85 | 12.48946 | -5.7213 | -0.1287 | Tr | 37.87206 | -5.5892 | -0.2608 | Ts | 7.11843  | -5.8885 | 0.0385  | Tr |
| 58 | <chem>Fc1cc2c(cc1N1CCNCC1)n(cc(e2=O)C(=O)O)C1CC1</chem>             | -5.89 | -3.42876 | -6.1319 | 0.2419  | Tr | 38.04329 | -5.5841 | -0.3059 | Tr | 3.91376  | -6.0021 | 0.1121  | Tr |
| 59 | <chem>COc1c(N2CC3C(C2)CCCN3)c(F)cc2e1n(cc(e2=O)C(=O)O)C1CC1</chem>  | -5.04 | 40.58302 | -4.9966 | -0.0434 | Tr | 47.08579 | -5.313  | 0.273   | Tr | 31.6996  | -5.0179 | -0.0221 | Tr |
| 60 | <chem>CN1CCN(CC1)c1c(F)cc2e3e1OCC(n3cc(e2=O)C(=O)O)C</chem>         | -5.54 | 12.6222  | -5.7179 | 0.1779  | Tr | 38.53765 | -5.5692 | 0.0292  | Tr | 13.97221 | -5.6458 | 0.1058  | Tr |
| 61 | <chem>COc1c(N2CCNC(C2)C)c(F)cc2e1n(cc(e2=O)C(=O)O)C1CC1</chem>      | -5.6  | 18.58314 | -5.5641 | -0.0359 | Ts | 35.78196 | -5.6518 | 0.0518  | Tr | 15.30416 | -5.5986 | -0.0014 | Ts |
| 62 | <chem>CCn1cc(C(=O)O)c(=O)e2e1c(F)c(N1CCNC(C1)C)c(e2)F</chem>        | -5.46 | 14.49586 | -5.6696 | 0.2096  | Tr | 36.34257 | -5.635  | 0.175   | Tr | 22.34584 | -5.3492 | -0.1108 | Tr |
| 63 | <chem>O=C1CC2(CCCC2)CC(=O)N1CCCCN1CCN(CC1)c1ncccn1</chem>           | -4.18 | 70.6394  | -4.2213 | 0.0413  | Tr | 89.78319 | -4.0334 | -0.1466 | Tr | 56.3868  | -4.1435 | -0.0365 | Tr |
| 64 | <chem>Nc1cc(Cl)c(c(c1)Cl)NC1=NCCN1</chem>                           | -5.42 | 30.12014 | -5.2665 | -0.1535 | Tr | 46.12478 | -5.3418 | -0.0782 | Tr | 26.58388 | -5.1991 | -0.2209 | Tr |
| 65 | <chem>Oc1ccc2c(c1)Oe1c(C32OC(=O)c2c3ccccc2)ccc(c1)O</chem>          | -4.8  | 52.2452  | -4.6958 | -0.1042 | Ts | 60.39418 | -4.9142 | 0.1142  | Tr | 38.86688 | -4.764  | -0.036  | Ts |
| 66 | <chem>CCC1C(=O)OCC1Cc1cncn1C</chem>                                 | -5.01 | 45.45159 | -4.871  | -0.139  | Tr | 60.87341 | -4.8998 | -0.1102 | Tr | 33.22806 | -4.9637 | -0.0463 | Tr |
| 67 | <chem>NC(=O)Cc1ccc(c1N)C(=O)c1ccccc1</chem>                         | -4.13 | 66.39199 | -4.3308 | 0.2008  | Tr | 78.42361 | -4.3738 | 0.2438  | Tr | 56.85974 | -4.1267 | -0.0033 | Tr |
| 68 | <chem>OC(COc1ccc(cc1)CCOCC1CC1)CNC(C)C</chem>                       | -4.22 | 56.45602 | -4.5871 | 0.3671  | Tr | 79.57738 | -4.3393 | 0.1193  | Ts | 41.47635 | -4.6716 | 0.4516  | Ts |
| 69 | <chem>OCC(=O)C1(O)C(C)CC2C1(C)CC(O)C1(C2CCC2=CC(=O)C=CC12C)F</chem> | -5.04 | 40.15433 | -5.0077 | -0.0323 | Tr | 61.27697 | -4.8877 | -0.1523 | Tr | 29.99189 | -5.0784 | 0.0384  | Tr |

Table S2. The list of SAKs together with their correlation weights for the three runs of the Monte Carlo optimization.

| SAk           | CW(SAk)  |          |          | SAk         | CW(SAk)  |          |          | SAk          | CW(SAk)  |          |          | SAk          | CW(SAk)  |          |          |
|---------------|----------|----------|----------|-------------|----------|----------|----------|--------------|----------|----------|----------|--------------|----------|----------|----------|
|               | Run 1    | Run 2    | Run 3    |             | Run 1    | Run 2    | Run 3    |              | Run 1    | Run 2    | Run 3    |              | Run 1    | Run 2    | Run 3    |
| 00001000000   | 1.274    | 0.1032   | 1.96681  | P2E0N...3-. | -1.4812  | -1.31587 | -1.7776  | S3E0C...14-. | 0.44564  | 1.64953  | -0.91923 | VS2-Br..6... | 0.19789  | -0.36443 | 1.33121  |
| 00010000000   | -0.30036 | 2.11413  | 0.19169  | P2E0O...0-. | 0.34078  | 2.29019  | -0.6932  | S3E0C...15-. | -1.99848 | -0.74092 | -0.93826 | VS2-Cl..4... | 1.26469  | 2.33226  | 2.00812  |
| 00010000100   | 1.37421  | -0.26425 | 2.45503  | P2E0O...1-. | 0.01155  | -0.57607 | -0.69213 | S3E0C...16-. | 0.67759  | -0.11618 | -0.45334 | VS2-Cl..5... | 0.14002  | 2.33351  | 1.39607  |
| 00011000000   | 0.34394  | 2.23622  | 0.66835  | P2E0O...2-. | 0.48072  | 0.15408  | 0.08716  | S3E0C...17-. | -1.12647 | 0.6056   | -1.63625 | VS2-N...10.. | -0.66603 | -0.65881 | -0.92023 |
| 10001000000   | 5.7547   | 3.11197  | 5.83166  | P2E0O...3-. | -0.95707 | 2.15298  | -1.01294 | S3E0C...2-.  | -0.98443 | 1.38505  | -3.06419 | VS2-N...11.. | 1.15639  | -0.62183 | -0.5221  |
| 10001001000   | 1.1416   | -0.83269 | 2.35988  | P2E0S...1-. | 0.00826  | 0.38622  | -0.73942 | S3E0C...18-. | 0.09075  | -0.81336 | 0.02913  | VS2-N...12.. | -0.53551 | -0.58821 | -0.75241 |
| 10010000100   | 2.12635  | 1.12654  | 0.20811  | P2E0S...2-. | 0.30889  | 1.10364  | 0.18874  | S3E0C...19-. | 0.88994  | 0.13725  | -0.14267 | VS2-N...13.. | 0.15954  | 0.07694  | 0.3318   |
| 10011000000   | -1.663   | 2.46527  | -4.60318 | P2E0o...2-. | 0.39237  | 2.00671  | 0.56053  | S3E0C...21-. | 0.28896  | -0.04734 | -0.08937 | VS2-N...14.. | 0.11163  | -0.80028 | 2.23133  |
| 10011001000   | -0.73869 | -0.53421 | 0.05964  | P2E0s...1-. | -1.86276 | -0.31292 | -3.56537 | S3E0C...22-. | -0.81424 | 0.44335  | 0.32228  | VS2-N...3... | -0.34118 | -0.8923  | -0.93073 |
| 10011100000   | 0.46632  | 1.09524  | -0.068   | P2E0s...2-. | 0.37368  | -0.37066 | 0.25741  | S3E0C...23-. | 0.6896   | -0.30319 | 2.18737  | VS2-N...4... | -0.19381 | 0.41273  | -0.10519 |
| 10011100010   | 0.02181  | -0.60736 | -0.70387 | P3E0C...0-. | 0.33024  | 0.10022  | 0.31375  | S3E0C...24-. | 2.03587  | 0.3233   | -0.04864 | VS2-N...5... | 0.33791  | 2.12598  | 0.43886  |
| 10011100100   | 2.20173  | 2.02994  | 2.4146   | P3E0C...1-. | 2.09031  | 0.17218  | 0.04277  | S3E0C...25-. | 1.23905  | 0.11149  | -0.10697 | VS2-N...6... | 2.31613  | 0.291    | -0.74318 |
| 10011101000   | 0.45966  | -0.6015  | -0.85083 | P3E0C...2-. | 0.23298  | 0.04083  | -0.456   | S3E0C...3-.  | 0.48521  | 2.08839  | 0.47973  | VS2-N...7... | -0.59219 | -0.68973 | 1.27198  |
| (...C.....)   | 0.31083  | 0.18215  | 0.45099  | P3E0C...3-. | -0.47227 | -1.59349 | -1.78076 | S3E0C...4-.  | -0.22418 | -0.54045 | -0.27889 | VS2-N...8... | 0.3806   | 0.06074  | 0.66103  |
| (.....)       | -0.71345 | -0.59678 | -0.51236 | P3E0C...4-. | -0.55611 | -0.54204 | -0.6173  | S3E0C...5-.  | 0.24318  | 0.43773  | 0.27768  | VS2-N...9... | -0.12383 | 0.24948  | -0.52627 |
| (...C...(...  | -0.95832 | 2.21307  | 0.04679  | P3E0C...5-. | 0.27803  | 0.10577  | -0.68751 | S3E0C...6-.  | -0.12379 | 0.25755  | 0.14952  | VS2-O...10.. | 0.02308  | 0.22019  | -0.8205  |
| (...F...(...  | 2.17058  | -0.69057 | 0.04087  | P3E0C...6-. | -0.5187  | 0.1436   | -0.84493 | S3E0C...7-.  | 0.68226  | 0.33699  | 0.44544  | VS2-O...13.. | 0.50564  | 0.84112  | -0.78969 |
| (...Cl...(... | 2.1063   | 0.2897   | -0.53918 | P3E0C...7-. | 0.51004  | -0.84694 | 0.50892  | S3E0C...8-.  | 0.08821  | 0.31078  | 0.39776  | VS2-O...2... | -1.10246 | -0.77705 | -1.41404 |
| (...N...(...  | -0.08282 | 0.01928  | -0.5112  | P3E0C...8-. | 0.24064  | 0.4784   | 0.18537  | S3E0C...9-.  | 0.40924  | 0.2429   | 2.13831  | VS2-O...3... | -0.75548 | -0.70574 | 2.31311  |
| (...O...(...  | 0.18161  | -0.25598 | -0.77102 | P3E0F...1-. | 0.36464  | 0.24578  | 0.33702  | S3E0F...11-. | 0.11953  | -0.6893  | -0.68661 | VS2-O...4... | 0.20391  | -0.56788 | 0.35179  |
| (...S...(...  | 2.0346   | -0.87078 | -0.13308 | P3E0F...2-. | 0.16316  | 0.68498  | 0.37234  | S3E0F...13-. | 2.68047  | 0.92008  | 0.1878   | VS2-O...5... | 0.04246  | 0.3331   | -0.46955 |
| (...c...(...  | 0.23509  | 0.16416  | 0.38741  | P3E0F...3-. | 0.03525  | 1.01755  | -0.83077 | S3E0F...3-.  | -0.0325  | 0.49407  | 0.73324  | VS2-O...6... | 0.17392  | 0.17121  | 0.19848  |
| (...n...(...  | -0.99215 | -0.83327 | -1.34535 | P3E0F...6-. | 2.11295  | -0.52727 | -0.04836 | S3E0F...4-.  | -0.32418 | 1.23867  | -0.52245 | VS2-O...7... | 0.30336  | -0.8242  | -1.05821 |
| ++++F---B2==  | 1.19009  | -0.30137 | 0.36338  | P3E0Br..3-. | -0.42701 | -0.30044 | -0.97579 | S3E0F...7-.  | -0.27387 | -0.9996  | 0.24129  | VS2-O...8... | 1.20396  | 0.73216  | 2.43346  |
| ++++F---N===  | 0.10882  | -0.80166 | 1.98738  | P3E0Cl..1-. | 0.10379  | 0.05239  | 2.44224  | S3E0F...8-.  | 0.4998   | -0.58746 | 0.1181   | VS2-O...9... | 0.43808  | -0.96875 | -0.53864 |
| ++++F---O===  | 0.10822  | -0.02877 | -0.75125 | P3E0Cl..2-. | -1.21006 | 2.46042  | -1.91578 | S3E0Br..5-.  | 0.30019  | -0.96466 | 0.56442  | VS2-S...4... | 0.32909  | 0.18224  | -0.86802 |
| ++++F---S===  | -0.81107 | 0.61788  | 1.89555  | P3E0N...0-. | -0.96539 | -0.44348 | -0.22167 | S3E0Cl..3-.  | 0.08447  | 0.27916  | 2.01828  | VS2-S...5... | 2.32444  | 2.08515  | 2.41221  |
| ++++CL--N===  | 2.71268  | -0.04167 | 1.58909  | P3E0N...1-. | 0.22465  | 0.31511  | 0.43627  | S3E0Cl..4-.  | -1.17263 | 0.8193   | -0.23001 | VS2-S...7... | -0.77066 | -0.90769 | 0.03829  |
| ++++CL--O===  | 2.09718  | 0.02125  | 1.09544  | P3E0N...2-. | -0.97331 | 0.20544  | 0.34293  | S3E0Cl..5-.  | -0.40119 | 2.1295   | 1.24006  | VS2-o...11.. | 2.5092   | 2.35953  | 4.05084  |
| ++++CL--S===  | -0.49883 | 2.1228   | 2.25014  | P3E0N...3-. | 0.18547  | -0.95994 | 0.14027  | S3E0Cl..6-.  | 0.40214  | 2.07524  | 0.27635  | VS2-s...10.. | -0.5079  | 0.25327  | 0.05789  |
| ++++Br--B2==  | 0.45093  | -0.90783 | 0.2589   | P3E0N...4-. | -0.94114 | -0.55611 | 0.33567  | S3E0Cl..7-.  | 0.33827  | 0.01215  | -0.28162 | VS2-s...11.. | -0.11082 | 0.13836  | 0.60672  |
| ++++Br--N===  | -1.66469 | -0.0559  | 0.03301  | P3E0N...5-. | 0.4188   | 0.47444  | 2.00934  | S3E0N...1-.  | 0.44568  | -0.5967  | 2.14601  | VS2-s...7... | -0.02919 | 0.59638  | -1.04991 |

|              |          |          |          |              |          |          |          |              |          |          |          |               |          |          |          |
|--------------|----------|----------|----------|--------------|----------|----------|----------|--------------|----------|----------|----------|---------------|----------|----------|----------|
| ++++Br--O=== | -0.81243 | 1.4587   | 0.42437  | P3E0N...6-.  | -0.91079 | -0.77738 | -0.57825 | S3E0N...10-. | 0.34342  | 1.37335  | 2.49671  | VS2-s...8...  | -0.4078  | -0.00906 | -0.09146 |
| ++++Br--S=== | 0.46672  | -0.53659 | 0.33788  | P3E0N...7-.  | 1.2186   | 2.38216  | -0.68271 | S3E0N...11-. | -0.06659 | 0.23786  | -0.80895 | VS3-C...10..  | 0.10775  | 0.37438  | -0.90557 |
| ++++Cl--B2== | 2.4197   | -0.10638 | 2.97367  | P3E0O...0-.  | 0.32061  | -0.23119 | 0.04165  | S3E0N...12-. | 0.42543  | -0.10909 | -0.51109 | VS3-C...11..  | 2.14745  | 1.23269  | 0.12604  |
| ++++N--B2==  | 5.61119  | 0.10733  | -0.17045 | P3E0O...1-.  | 0.24612  | -0.97559 | -0.96866 | S3E0N...13-. | 1.19381  | -0.65987 | 0.36133  | VS3-C...12..  | 0.37116  | 0.13876  | 1.1707   |
| ++++N--O===  | -0.79562 | -0.77154 | 0.12613  | P3E0O...2-.  | -4.03841 | -1.06281 | -3.57496 | S3E0N...15-. | 0.2162   | -0.10446 | 0.43071  | VS3-C...13..  | 0.13211  | 0.21377  | 0.56851  |
| ++++N--S===  | -0.33215 | 0.18703  | -1.0985  | P3E0O...3-.  | 0.06788  | 0.484    | 2.2542   | S3E0N...17-. | -0.86955 | 0.36092  | -0.16061 | VS3-C...14..  | 0.62858  | -1.08268 | 0.37916  |
| ++++O--B2==  | 0.00033  | -0.86163 | 0.35723  | P3E0O...4-.  | -0.76746 | 0.35805  | -0.99768 | S3E0N...2-.  | -2.6125  | -2.57542 | -3.83907 | VS3-C...15..  | 0.37793  | 0.02274  | -0.84761 |
| ++++O--S===  | 0.37343  | 2.34852  | 0.56596  | P3E0O...6-.  | 1.1918   | 0.21855  | 1.29067  | S3E0N...18-. | 0.46217  | -0.52037 | 0.4727   | VS3-C...16..  | -1.31444 | 0.47163  | -0.80138 |
| ++++S--B2==  | -0.94498 | 0.09379  | 1.15443  | P3E0S...0-.  | -1.52955 | -0.66776 | -1.33533 | S3E0N...22-. | 0.70352  | 0.36249  | 2.36181  | VS3-C...17..  | 0.35092  | 0.4005   | 0.03832  |
| +.....       | 0.12169  | 2.23137  | -1.46445 | P3E0S...2-.  | -0.60259 | 0.00459  | 0.1249   | S3E0N...3-.  | 0.28154  | 0.62745  | 0.14374  | VS3-C...18..  | 0.82218  | -1.76164 | -1.76107 |
| +...[...(... | 0.4666   | -0.96084 | 0.17609  | P3E0o...5-.  | 1.19429  | 2.4829   | 2.32268  | S3E0N...4-.  | -0.67418 | -1.66158 | 0.31169  | VS3-C...2...  | 0.05652  | -0.84909 | 0.10322  |
| -.....       | 0.73774  | 2.17354  | -0.20624 | P3E0s...2-.  | 2.2248   | 0.49174  | 0.56847  | S3E0N...5-.  | -1.69166 | -0.71171 | -1.17761 | VS3-C...19..  | 0.6613   | -0.81327 | -0.93143 |
| 1...(.....   | -0.65593 | -0.8978  | -0.65958 | P3E0s...3-.  | 2.09169  | -1.34823 | -0.67445 | S3E0N...6-.  | 0.11607  | -0.50328 | -2.13172 | VS3-C...20..  | -0.79855 | 0.4299   | 0.06104  |
| 1.....       | 0.23469  | 0.362    | -0.63799 | P3E0s...4-.  | -0.63098 | -0.76741 | -0.64768 | S3E0N...7-.  | -1.92196 | -2.48822 | -2.47684 | VS3-C...21..  | 0.0859   | 0.27915  | -0.06633 |
| 1...C...(... | 0.127    | -0.86276 | 0.21145  | P3E0s...5-.  | 0.02729  | 2.08126  | -0.59206 | S3E0N...8-.  | 6.34246  | 0.30649  | 7.34229  | VS3-C...22..  | 0.04967  | -0.69883 | 1.37215  |
| 1...N...(... | 0.1187   | -0.53176 | -0.92594 | P4E0C...0-.  | 0.03673  | 0.13164  | -0.51676 | S3E0N...9-.  | 0.49628  | -0.96909 | 1.10903  | VS3-C...23..  | -0.1035  | -0.83186 | -1.66126 |
| 1...N...1... | 0.03809  | -0.52915 | -0.76535 | P4E0C...1-.  | 2.35265  | 0.46709  | 2.41446  | S3E0O...1-.  | -0.60472 | 0.39472  | 0.40726  | VS3-C...24..  | -0.07466 | 0.98817  | 0.95156  |
| 1...O...(... | -0.88498 | 0.38864  | 0.17417  | P4E0C...10-. | -0.6321  | 0.39681  | -0.65978 | S3E0O...10-. | 0.28122  | 0.19548  | -0.44304 | VS3-C...25..  | -1.07451 | 0.17507  | 3.18227  |
| 1...c...(... | 0.22341  | -0.99896 | 0.61084  | P4E0C...11-. | 0.28657  | -0.57517 | -0.03405 | S3E0O...11-. | 0.12713  | -0.71751 | -0.08392 | VS3-C...26..  | -1.29455 | 0.23415  | -0.49101 |
| 1...c...1... | 2.31782  | 0.2209   | 2.18996  | P4E0C...12-. | 0.17488  | 0.11257  | 0.03593  | S3E0O...13-. | 0.32257  | -0.22041 | -0.26387 | VS3-C...27..  | 0.36192  | 0.63679  | 0.10623  |
| 1...n...(... | -0.59508 | -0.51556 | -0.90082 | P4E0C...13-. | 0.08859  | 0.23814  | -0.00203 | S3E0O...14-. | 0.11362  | 0.5393   | -0.55909 | VS3-C...3...  | 0.31608  | -0.75248 | -0.99871 |
| 1...s...(... | 0.27284  | -0.71909 | -0.63494 | P4E0C...14-. | -0.87448 | 0.24014  | -0.51536 | S3E0O...16-. | -0.89593 | 1.1447   | -0.10181 | VS3-C...28..  | 0.01298  | 2.51284  | 0.15574  |
| 2...(.....   | -0.18978 | 1.20706  | 0.3486   | P4E0C...15-. | 0.08347  | 0.35587  | 2.39125  | S3E0O...2-.  | 0.48637  | -0.83209 | 0.3439   | VS3-C...4...  | -1.41126 | -1.8921  | -0.77316 |
| 2.....       | 1.16562  | -0.38085 | -0.02386 | P4E0C...16-. | -0.14685 | 0.88174  | 2.41492  | S3E0O...18-. | -0.6813  | 0.23235  | -0.29965 | VS3-C...5...  | 0.52259  | 1.21354  | 2.2006   |
| 2...1.....   | 2.43247  | 0.21573  | 0.49488  | P4E0C...17-. | -1.13335 | 1.71664  | -0.3497  | S3E0O...3-.  | 0.19114  | -0.81866 | 0.43117  | VS3-C...6...  | 0.26265  | 0.36411  | 0.14558  |
| 2...C...(... | -1.29823 | -0.85005 | -0.4562  | P4E0C...2-.  | -0.59519 | -0.86888 | -0.07663 | S3E0O...4-.  | 0.45776  | 1.17977  | 0.3116   | VS3-C...7...  | -0.20669 | 0.2692   | -0.51665 |
| 2...C...1... | -0.34584 | 0.21528  | 5.13327  | P4E0C...18-. | -0.66418 | -0.1112  | 0.62116  | S3E0O...5-.  | 0.32123  | 0.48801  | -0.9824  | VS3-C...8...  | -0.4152  | 0.47601  | -0.86634 |
| 2...N...(... | -0.59753 | -0.64893 | -0.81641 | P4E0C...19-. | -0.58211 | -0.97666 | 1.21752  | S3E0O...6-.  | -1.27423 | -1.40484 | -2.86082 | VS3-C...9...  | 0.20062  | 0.39004  | 2.30174  |
| 2...c...(... | 0.23214  | 1.48488  | 0.21828  | P4E0C...20-. | 0.54085  | 0.13455  | -0.7605  | S3E0O...7-.  | 0.06591  | 0.32265  | 0.17748  | VS3-F...12..  | 0.07601  | 0.06354  | 1.3288   |
| 2...c...1... | 0.29629  | 2.34635  | 0.27389  | P4E0C...21-. | -0.47214 | -0.59699 | -0.90846 | S3E0O...8-.  | -1.09061 | -0.46665 | 0.59154  | VS3-F...14..  | -0.64664 | 0.22239  | 0.54655  |
| 2...n...(... | -0.08498 | 0.44589  | 1.0796   | P4E0C...22-. | 0.79902  | 0.48087  | -0.58937 | S3E0O...9-.  | 0.46003  | 0.21198  | 0.05187  | VS3-F...4...  | -0.03069 | -0.7939  | 2.03155  |
| 2...n...1... | -0.31951 | -0.5852  | -0.03401 | P4E0C...3-.  | -0.85977 | 0.08411  | -0.12165 | S3E0S...0-.  | 2.46055  | 2.39138  | 4.0295   | VS3-F...5...  | 0.32291  | 0.00493  | 0.0225   |
| 2...s...(... | 3.22974  | -0.99767 | 0.42339  | P4E0C...4-.  | 0.37249  | 0.21562  | 0.11033  | S3E0S...1-.  | 0.42681  | -0.65865 | -0.54173 | VS3-F...8...  | -0.48159 | 0.1574   | -0.43043 |
| 3...(.....   | -0.35933 | 0.4267   | -1.25771 | P4E0C...5-.  | -0.07252 | 0.66654  | 0.00024  | S3E0S...2-.  | -0.04621 | 0.40626  | 2.20527  | VS3-F...9...  | -0.70097 | 0.36599  | -0.14776 |
| 3.....       | 0.17567  | 0.1593   | -0.76906 | P4E0C...6-.  | -0.51102 | 0.391    | -0.79997 | S3E0S...4-.  | -0.59783 | -0.53875 | -1.25536 | VS3-Br...6... | 0.13112  | -0.52139 | -0.07933 |

|                |          |          |          |               |          |          |          |               |          |          |          |              |          |          |          |
|----------------|----------|----------|----------|---------------|----------|----------|----------|---------------|----------|----------|----------|--------------|----------|----------|----------|
| 3...2.....     | -0.21245 | 0.08535  | -0.32244 | P4E0C...7-..  | 0.06986  | 2.21851  | 1.03921  | S3E0o...12-.  | 0.21274  | 0.00753  | 2.3293   | VS3-Cl..4... | 0.35633  | 0.28498  | 2.46617  |
| 3...C...(...   | -0.83079 | -0.64525 | -0.21388 | P4E0C...8-..  | 0.20582  | 2.17532  | 0.11798  | S3E0s...10-.  | -0.75985 | 0.44265  | 2.19473  | VS3-Cl..5... | -0.60661 | -0.45445 | -1.3015  |
| 3...N...(...   | 0.16106  | -0.06718 | 0.62235  | P4E0C...9-..  | -0.84545 | -0.74308 | -0.55846 | S3E0s...11-.  | -2.48499 | -1.12857 | -0.46342 | VS3-Cl..6... | -0.78819 | 2.11069  | 2.30181  |
| 3...c...(...   | 1.29651  | 0.05486  | 0.46129  | P4E0F...1-..  | 1.40265  | -1.03377 | 1.89129  | S3E0s...12-.  | 0.28428  | 2.07933  | 2.05072  | VS3-Cl..7... | 0.39618  | 0.38194  | 2.1227   |
| 3...c...1...   | -0.96535 | -0.88711 | -0.60174 | P4E0F...16-.  | -0.50121 | -0.58235 | -0.75328 | S3E0s...13-.  | 0.11451  | 0.17937  | 0.28619  | VS3-Cl..8... | 2.49663  | 0.26102  | 2.19678  |
| 3...c...2...   | 0.30449  | -0.71089 | 0.43858  | P4E0F...3-..  | 0.60456  | 0.38711  | -0.72464 | S3E0s...7-..  | -0.85254 | -0.80958 | 0.07899  | VS3-N...10.. | 0.02307  | 0.24638  | 0.26086  |
| 3...n...(...   | 0.95222  | -0.33623 | 0.14716  | P4E0F...4-..  | 0.24386  | 1.23133  | -0.68921 | S3E0s...8-..  | -0.07345 | -0.37262 | 0.17506  | VS3-N...11.. | 3.69483  | -0.74784 | -0.22654 |
| =...(.....     | 0.02402  | -0.13964 | -0.8594  | P4E0F...7-..  | 0.38579  | -0.72426 | -0.93929 | S3E0s...9-..  | -0.90968 | -1.43268 | -0.19128 | VS3-N...12.. | 2.2463   | 0.42839  | 2.45604  |
| =...(.....     | 0.13294  | -0.84407 | 0.49496  | P4E0Br...7-.. | -0.66169 | -0.14103 | 0.03667  | PT2-C...1...  | 0.48657  | 0.38133  | 0.13775  | VS3-N...13.. | 0.28577  | -0.64961 | -0.54677 |
| =.....         | -0.55327 | 0.18729  | -0.67134 | P4E0Cl...1-.. | 0.67112  | 2.23465  | 0.73008  | PT2-C...2...  | 0.09296  | -0.63839 | -0.14644 | VS3-N...14.. | 0.36009  | 0.04591  | 0.45642  |
| =...1.....     | 2.24897  | 0.49522  | 0.30898  | P4E0Cl...3-.. | 2.23396  | 2.15129  | 0.81639  | PT2-C...3...  | 0.21322  | -0.29998 | 0.39689  | VS3-N...15.. | -1.11397 | 0.25048  | -1.05666 |
| =...2.....     | 0.32882  | -0.85663 | 0.05474  | P4E0Cl...4-.. | -0.66806 | -0.74482 | 0.77829  | PT2-C...4...  | 0.11839  | -0.81438 | -0.92069 | VS3-N...16.. | 0.07843  | 0.24677  | -0.87514 |
| =...C...(...   | 0.58574  | -0.65692 | -0.67769 | P4E0N...0-..  | -0.00489 | -0.54044 | -0.67426 | PT2-C...5...  | -0.75292 | 0.12187  | -0.87179 | VS3-N...18.. | 0.25064  | -0.85874 | 2.21563  |
| =...C...1...   | 0.23079  | -0.11838 | 2.45331  | P4E0N...1-..  | 0.39622  | 0.73037  | -0.95318 | PT2-C...6...  | 0.28327  | 1.38791  | 0.37658  | VS3-N...20.. | 3.39642  | 0.07714  | -0.17803 |
| =...N...(...   | -0.61832 | 0.05467  | -0.66972 | P4E0N...10-.  | 2.83833  | 1.79948  | 5.54355  | PT2-C...7...  | 0.37711  | -0.55212 | 0.21182  | VS3-N...21.. | 0.34204  | -0.64353 | 0.56463  |
| =...O...(...   | 0.41795  | 0.34936  | -0.56761 | P4E0N...11-.  | -0.54287 | 0.46522  | -0.77217 | PT2-F...2...  | 0.09445  | 0.65438  | 1.9631   | VS3-N...25.. | -0.6302  | -0.51561 | -1.08392 |
| =...S...(...   | 0.35368  | -0.6422  | -0.73137 | P4E0N...12-.  | 0.00583  | 1.38921  | -0.8959  | PT2-F...3...  | 0.06839  | -0.4041  | 0.00227  | VS3-N...3... | -0.66262 | -0.31113 | -0.7804  |
| =...c...1...   | 0.35866  | 0.48515  | -0.97424 | P4E0N...13-.  | 4.42962  | 1.72127  | 3.26743  | PT2-Br...2... | 0.14258  | 0.04525  | 2.08006  | VS3-N...4... | 0.22084  | 0.07795  | -0.71844 |
| C...(.....     | 0.0426   | -0.67721 | 0.17864  | P4E0N...15-.  | -0.51528 | 0.4271   | -0.7184  | PT2-Cl...2... | -0.14086 | -0.21292 | 1.84524  | VS3-N...5... | -0.62385 | 0.06777  | -1.77256 |
| C...(.....     | -0.71913 | 0.2184   | -0.533   | P4E0N...16-.  | -0.57215 | 0.0389   | -0.55366 | PT2-Cl...3... | 0.20608  | 0.22394  | 0.1782   | VS3-N...6... | -1.8578  | -1.57997 | -1.39506 |
| C...(.....1... | 0.39929  | 0.062    | 0.46727  | P4E0N...2-..  | 0.31935  | -0.84497 | 0.39233  | PT2-N...1...  | -0.12615 | -0.77577 | 0.45566  | VS3-N...7... | 0.05164  | 1.89836  | 2.05437  |
| C...(.....2... | 0.27037  | 0.44539  | 2.20457  | P4E0N...21-.  | 1.35126  | -0.09036 | 0.04584  | PT2-N...2...  | 0.34689  | 0.42706  | 0.18482  | VS3-N...8... | -0.01223 | 0.86589  | -1.47814 |
| C...(.....3... | 1.14044  | 1.9098   | 2.71117  | P4E0N...3-..  | 0.15786  | 0.14991  | 0.0797   | PT2-N...3...  | 0.20475  | -0.65931 | 0.28685  | VS3-N...9... | 0.07745  | 0.28184  | 0.1021   |
| C...(.....=... | 0.381    | 0.43397  | -0.28917 | P4E0N...4-..  | 0.49062  | -0.66291 | 0.5915   | PT2-N...4...  | 0.28305  | 0.16108  | 0.19124  | VS3-O...10.. | 1.14408  | 0.015    | -0.85979 |
| C...(.....C... | -0.36795 | -0.8476  | -0.88639 | P4E0N...5-..  | -0.77823 | 0.07997  | 0.23926  | PT2-N...5...  | -1.64622 | 0.98206  | -3.36207 | VS3-O...11.. | -0.55834 | -0.13345 | 0.36688  |
| C.....         | 0.36029  | 0.4981   | 0.10225  | P4E0N...6-..  | 0.37231  | -0.08637 | -0.22597 | PT2-N...6...  | 0.12406  | 0.15404  | 0.69576  | VS3-O...12.. | -0.38988 | 0.38124  | 0.35929  |
| C...1...(...   | 0.01491  | -0.85259 | 0.65863  | P4E0N...7-..  | -0.86138 | 0.04756  | -0.41231 | PT2-O...1...  | 0.0989   | 0.27965  | -0.82726 | VS3-O...14.. | 0.27115  | -0.68045 | 0.17811  |
| C...1.....     | 0.12928  | -0.51331 | -0.60892 | P4E0N...8-..  | -0.51269 | -0.50521 | -1.96934 | PT2-O...2...  | -0.95839 | 0.26055  | 0.73401  | VS3-O...16.. | -0.83577 | -1.13391 | -0.83799 |
| C...1...2...   | -0.07439 | -1.73339 | -0.93486 | P4E0N...9-..  | -0.81125 | 0.19782  | -0.74658 | PT2-O...3...  | 0.14522  | -0.77756 | 0.07567  | VS3-O...18.. | 0.29996  | -0.53936 | 0.28477  |
| C...1...=...   | 0.69187  | -0.71348 | 0.74685  | P4E0O...0-..  | 0.05774  | 0.03625  | 0.21987  | PT2-O...4...  | 0.4542   | 2.18124  | 0.36764  | VS3-O...2... | -1.80306 | -0.93739 | -2.32978 |
| C...1...C...   | 0.00808  | -0.07592 | -0.54204 | P4E0O...1-..  | -0.92106 | -0.87576 | -3.1221  | PT2-O...5...  | -0.67123 | 0.23542  | 1.92304  | VS3-O...20.. | -0.53141 | -0.51742 | -0.05428 |
| C...2...(...   | -0.82253 | 0.53996  | -1.99396 | P4E0O...10-.  | 1.37399  | 1.23763  | 0.14762  | PT2-S...2...  | 0.21616  | 0.40146  | 0.46449  | VS3-O...3... | 0.06582  | -0.9475  | 0.12857  |
| C...2.....     | -0.85598 | 0.25635  | -0.90303 | P4E0O...12-.  | 0.3884   | -1.03888 | -0.97448 | PT2-S...3...  | 0.59137  | -0.02005 | -0.54081 | VS3-O...4... | 1.14146  | 0.42055  | -0.49425 |
| C...2...1...   | 0.07476  | -0.68238 | 0.10291  | P4E0O...14-.  | -0.3666  | -0.57548 | -0.69097 | PT2-o...4...  | -1.11608 | 0.85916  | 1.37411  | VS3-O...5... | 4.22681  | 4.43798  | 5.08434  |
| C...2...=...   | 0.48881  | 0.22294  | 0.16378  | P4E0O...16-.  | 1.14479  | 0.34688  | 1.28314  | PT2-s...3...  | 0.42042  | -0.19048 | -1.39227 | VS3-O...6... | -0.34913 | -0.89338 | -0.65311 |

|              |          |          |          |               |          |          |          |               |          |          |          |              |          |          |          |
|--------------|----------|----------|----------|---------------|----------|----------|----------|---------------|----------|----------|----------|--------------|----------|----------|----------|
| C...2...C... | 1.28778  | 1.48801  | 1.34452  | P4E0O...3-..  | -0.06635 | 0.24579  | 0.19778  | PT2-s...4...  | 0.1687   | -0.80481 | -0.04818 | VS3-O...7... | -1.09665 | -0.08502 | -0.79459 |
| C...3.....   | -0.14854 | 0.60233  | -0.70534 | P4E0O...4-..  | -1.76903 | -0.97362 | -1.21244 | PT3-C...1...  | -0.00361 | -0.29636 | 0.42818  | VS3-O...8... | 0.17318  | 0.20809  | 0.40586  |
| C...3...2... | 0.43343  | 0.05177  | 0.34101  | P4E0O...6-..  | -0.93073 | 0.55068  | 0.37658  | PT3-C...10..  | 0.40598  | 0.27364  | 0.0772   | VS3-O...9... | 0.1522   | 0.09551  | 2.08664  |
| C...3...C... | -0.97337 | -0.83717 | 0.30997  | P4E0O...7-..  | 0.06521  | -0.88499 | 0.13988  | PT3-C...11..  | 0.38211  | 2.17648  | 0.42649  | VS3-S...4... | 2.71307  | 0.42803  | 2.23117  |
| C...=.....   | 0.19828  | 2.29894  | 0.73351  | P4E0O...8-..  | 0.0463   | 0.05354  | 2.22939  | PT3-C...2...  | 0.30851  | 1.5748   | 2.98965  | VS3-S...5... | 0.49147  | 0.3805   | -0.66051 |
| C...=...2... | -0.84171 | 0.1843   | -1.11049 | P4E0O...9-..  | 0.31702  | 0.09603  | 0.02066  | PT3-C...3...  | -0.07117 | 0.08367  | 0.11721  | VS3-S...6... | 0.37594  | 0.16978  | 2.03871  |
| C...=...C... | 0.05868  | 2.05932  | 2.22431  | P4E0S...2-..  | 1.06393  | 0.13586  | 0.39549  | PT3-C...4...  | -0.67029 | 0.05381  | -0.79483 | VS3-S...8... | -0.6482  | -1.07329 | -0.91176 |
| C...C...(... | -0.51832 | -0.77962 | -1.22996 | P4E0o...11-   | 2.16592  | 0.21668  | -0.12701 | PT3-C...5...  | -0.34693 | 0.29252  | 0.10255  | VS3-o...14.. | 1.51645  | 0.53745  | 0.60259  |
| C...C.....   | 0.19676  | 0.08445  | 2.04398  | P4E0s...10-   | 0.4324   | 0.03005  | -0.91068 | PT3-C...6...  | 2.82453  | 2.50315  | 0.16137  | VS3-s...10.. | 0.72899  | -0.27296 | 1.61405  |
| C...C...1... | -0.97671 | 0.33139  | -0.8968  | P4E0s...12-   | -0.79883 | -0.08105 | -0.4817  | PT3-C...7...  | 0.28934  | 0.31924  | 0.48458  | VS3-s...11.. | -0.71413 | 0.31911  | -1.41887 |
| C...C...2... | -0.16842 | 0.24163  | -0.01064 | P4E0s...13-   | -0.69294 | 1.4305   | 0.59251  | PT3-C...8...  | -0.68656 | 0.10179  | -0.84464 | VS3-s...12.. | 0.09605  | 0.46761  | 2.14086  |
| C...C...3... | -0.77175 | -0.55131 | -0.91806 | P4E0s...4-..  | 0.63412  | 1.22253  | 2.30469  | PT3-C...9...  | 0.42159  | 0.28775  | 0.10701  | VS3-s...13.. | -2.39683 | -0.27375 | -0.81188 |
| C...C...=... | -0.11563 | 2.35786  | 2.08774  | P4E0s...7-..  | 0.26272  | -0.0982  | -0.96587 | PT3-F...2...  | 0.36062  | 0.06053  | 2.18872  | VS3-s...14.. | 0.84408  | 0.8975   | 4.351    |
| C...C...C... | -0.2775  | 2.4566   | 0.19253  | NNC-C...101.  | 1.40151  | -0.87039 | 2.00634  | PT3-F...3...  | -0.68204 | 0.0066   | 0.49534  | VS3-s...15.. | 0.15259  | 0.09006  | -0.87313 |
| C...N...(... | -0.86866 | -0.81376 | -0.82108 | NNC-C...110.  | 0.39099  | 0.38621  | 0.10264  | PT3-F...4...  | 0.24129  | 0.40447  | 0.48843  | VS3-s...9... | -0.86286 | 0.36693  | 0.14742  |
| C...N...1... | 2.15353  | 0.16584  | 0.89351  | NNC-C...202.  | 0.22192  | 2.11251  | 1.13826  | PT3-F...7...  | 0.97073  | -0.51039 | -0.47292 | Smax.0.....  | 2.49398  | -0.92216 | -0.46067 |
| C...N...3... | 1.14364  | 0.17982  | 2.37754  | NNC-C...211.  | 0.04875  | 0.43672  | 0.22454  | PT3-Br...4... | -0.73756 | -0.68119 | 0.49614  | Smax.1.....  | 2.49694  | 2.32076  | 0.64499  |
| C...N...=... | 1.17796  | 2.02355  | -0.94388 | NNC-C...220.  | -0.38888 | 0.17749  | 2.28157  | PT3-Cl...2... | 2.09088  | 0.14736  | 0.02322  | Smax.2.....  | -0.78477 | -0.75287 | -0.68845 |
| C...N...C... | 0.14993  | -0.91813 | -0.89699 | NNC-C...303.  | 0.67268  | -0.11969 | 0.35905  | PT3-Cl...3... | -0.96086 | 2.36389  | 1.58977  | [...(...     | 0.64432  | 0.10506  | 1.50911  |
| C...O...(... | 0.08645  | 0.17415  | 2.33068  | NNC-C...312.  | -0.77168 | 0.2155   | 0.03874  | PT3-N...1...  | 0.73689  | 0.48545  | 0.31009  | [...(...     | 0.0648   | 0.6247   | 2.73281  |
| C...O...1... | -0.18786 | 0.02541  | 2.28111  | NNC-C...321.  | -1.87379 | -1.38289 | -1.93388 | PT3-N...2...  | -1.0877  | -1.00831 | -0.65871 | [...+.....   | -0.11551 | -0.0844  | -0.10383 |
| C...O...2... | 0.21609  | -0.1634  | 2.10102  | NNC-C...330.  | 0.07436  | 2.27038  | 0.31491  | PT3-N...3...  | 0.05121  | 0.25525  | -0.00146 | [...+...N... | 2.3384   | 0.46895  | -1.30753 |
| C...O...C... | 2.34818  | 0.32628  | 0.15414  | NNC-C...404.  | 0.20574  | 2.47555  | -0.03329 | PT3-N...4...  | 1.41201  | 0.11992  | -1.04535 | [...-.....   | 1.4791   | 0.29206  | 2.56089  |
| C...c...1... | 0.13825  | 2.36363  | 2.26321  | NNC-C...431.  | -0.05027 | 0.11701  | 0.50682  | PT3-N...5...  | 0.0364   | 0.37208  | -0.90778 | [...-...O... | 1.5083   | -0.95009 | 0.18294  |
| C...c...2... | 2.36203  | -0.05159 | 2.36611  | NNC-C...440.  | 0.25914  | -0.98302 | 0.42725  | PT3-N...6...  | -1.59339 | 0.17857  | -0.47615 | [.....       | 0.00771  | -2.72871 | -0.98249 |
| C...n...1... | 0.22413  | 0.12942  | 0.28199  | NNC-F...110.  | -0.72522 | 0.36455  | -0.0277  | PT3-N...7...  | -0.9801  | -0.29528 | 0.34496  | [...2...(... | -0.83391 | 0.63213  | 2.39159  |
| C3.....0...  | 0.25687  | 2.52917  | -5.69739 | NNC-Br...101. | -1.24166 | 0.79157  | -0.67207 | PT3-N...8...  | 0.11578  | 1.02792  | 0.72699  | [...2.....   | 0.01313  | -1.05297 | -1.21786 |
| C3.....1...  | 5.3122   | -1.32744 | 5.39159  | NNC-Cl...110. | 0.78342  | -4.3267  | -3.13984 | PT3-N...9...  | 0.04053  | 0.00452  | 2.31339  | [...H.....   | 0.60809  | -0.54418 | 0.84679  |
| C4.....0...  | 10.9495  | 5.28164  | 3.93305  | NNC-N...101.  | 0.27258  | 0.31054  | -0.14835 | PT3-O...1...  | -0.57906 | -1.03822 | -0.4553  | [...N...+... | 0.20384  | 2.14627  | -0.70111 |
| C5.....0...  | 0.2976   | -0.62016 | 0.35106  | NNC-N...110.  | 0.0993   | -0.06403 | -0.66328 | PT3-O...2...  | 0.23218  | 0.23841  | 0.56082  | [...N.....   | 0.04474  | 1.26872  | -1.13079 |
| C5.....1...  | 2.1364   | 2.36404  | 0.41622  | NNC-N...202.  | 2.38553  | 2.22296  | 0.01698  | PT3-O...3...  | -1.03701 | -2.02252 | -1.04855 | [...O...-... | 0.37919  | -0.5535  | -0.61776 |
| C5....H.1... | -1.22659 | 0.08819  | 2.56134  | NNC-N...211.  | -1.23216 | -0.00042 | -0.69167 | PT3-O...4...  | 2.49154  | 1.55484  | -1.43594 | [...O.....   | 0.45351  | 0.05236  | 2.38921  |
| C5...AH.1... | 2.18105  | 2.08893  | -0.96514 | NNC-N...220.  | -0.54997 | 0.16589  | 0.17591  | PT3-O...5...  | -0.53431 | 0.44448  | -0.71848 | [...[...-... | -0.33568 | 0.05807  | -1.44435 |
| C5...AH.2... | 0.12012  | -0.06178 | 0.41046  | NNC-N...312.  | -0.78718 | 0.28003  | 2.25449  | PT3-O...6...  | -0.61391 | -0.77592 | 0.65364  | [...[.....   | 0.31865  | 2.25042  | 1.28382  |
| C6.....0...  | -0.86584 | 0.01087  | 0.02474  | NNC-N...321.  | 0.03396  | 0.02931  | -0.81699 | PT3-O...7...  | 0.94745  | -0.5103  | -0.94878 | [...[...N... | 0.34085  | 0.24628  | 0.21973  |

|               |          |          |          |               |          |          |          |              |          |          |          |               |          |          |          |
|---------------|----------|----------|----------|---------------|----------|----------|----------|--------------|----------|----------|----------|---------------|----------|----------|----------|
| C6.....3...   | 0.49362  | -0.9465  | -0.40822 | NNC-N...330.  | 0.34683  | -0.18532 | -0.55508 | PT3-O...8... | 1.39304  | 2.45949  | 1.57125  | [...n...H...  | 0.17819  | 0.21443  | -0.74039 |
| C6...A...1... | 0.24721  | 0.00476  | 2.11708  | NNC-O...101.  | 0.03696  | 2.3721   | 0.27363  | PT3-S...2... | 0.0158   | 2.12671  | 0.53822  | c...(...(...  | -0.80362 | 0.23616  | -0.64241 |
| C6...A...2... | 0.1761   | -0.53812 | 2.35701  | NNC-O...110.  | -0.5627  | -0.46672 | -0.79118 | PT3-S...4... | -0.58552 | -0.95471 | -1.17046 | c...(.....    | -0.69573 | 0.00462  | -0.34324 |
| C6...AH.2...  | 2.12902  | 2.24972  | 1.76498  | NNC-O...220.  | 2.43317  | -0.62382 | -0.46884 | PT3-o...7... | 0.14302  | 0.04176  | 1.41378  | c...(...1...  | -0.40574 | 2.00683  | 2.42012  |
| C6...AH.3...  | -0.09673 | 0.60009  | -0.72518 | NNC-S...413.  | 0.5776   | 0.31771  | 0.07894  | PT3-s...4... | 1.32552  | 0.45803  | 0.15986  | c...(...2...  | 0.3742   | -0.79583 | 0.2262   |
| C6...AH.4...  | 2.15532  | 0.35562  | -0.23698 | NNC-o...220.  | 0.33933  | 0.23206  | 2.30898  | PT3-s...5... | -0.53378 | -0.04039 | 0.10905  | c...(...3...  | 0.41437  | 0.45747  | 0.23251  |
| C6...AH.5...  | -0.96303 | -0.847   | 2.10138  | NNC-s...211.  | 0.01686  | -0.74096 | -0.03189 | PT3-s...6... | 0.05067  | 0.26133  | 0.15798  | c...(=...=... | -0.74187 | 0.01276  | 0.00833  |
| C7.....0...   | 0.02773  | -0.77968 | 0.28712  | NNC-s...220.  | 0.49316  | 0.01282  | 0.49778  | PT3-s...7... | 2.13173  | 2.305    | 1.40865  | c...(...C...  | 0.54077  | 0.13723  | 0.32186  |
| C7....H.2...  | 1.63121  | 0.26826  | 0.15418  | NNEOC...100-  | 0.46875  | 0.1526   | 0.01442  | PT4-C...1... | 0.48246  | -0.71371 | 0.10312  | c...(...F...  | -0.96525 | -0.35509 | 0.25094  |
| C7...AH.1...  | 0.40307  | 1.23492  | 0.59142  | NNEOC...109-  | 0.51133  | 0.44263  | 1.19882  | PT4-C...10.. | 0.11613  | -0.94589 | 0.41149  | c...(...Cl... | 2.30634  | 0.58646  | 0.18212  |
| BOND00000000  | 1.7243   | 1.78708  | -0.03511 | NNEOC...200-  | -0.35737 | 0.37196  | 0.14582  | PT4-C...11.. | 0.02384  | 0.45068  | -0.59787 | c...(...N...  | -0.69498 | 0.05861  | 0.08447  |
| BOND10000000  | 1.39454  | 2.09746  | 0.23456  | NNEOC...209-  | -0.8685  | 0.30216  | 0.3322   | PT4-C...12.. | 0.26511  | 0.03568  | 0.67452  | c...(...O...  | 0.09724  | 0.14     | 1.11846  |
| F...(...(...  | 1.58952  | 1.4189   | 2.03016  | NNEOC...218-  | 0.23108  | 0.04018  | 2.49076  | PT4-C...13.. | 0.42191  | -0.2398  | 0.58849  | c...(...c...  | -0.19484 | -0.96251 | -0.45733 |
| F...(.....    | -0.8507  | -0.0577  | -0.95708 | NNEOC...300-  | -0.10743 | -0.3502  | -0.81493 | PT4-C...14.. | 0.26987  | 0.02317  | 0.49044  | c.....        | 0.3234   | 0.22145  | 0.27649  |
| F...(...2...  | -0.95236 | -0.85601 | -0.79635 | NNEOC...309-  | 0.47999  | 0.35377  | -0.90649 | PT4-C...15.. | 0.41204  | 0.26793  | 0.69911  | c...1...(...  | -0.80762 | -0.99285 | -1.51468 |
| F...(...C...  | 0.13756  | -0.04046 | -1.48119 | NNEOC...318-  | -1.12389 | -0.76577 | -1.16172 | PT4-C...16.. | -0.31343 | 1.12137  | 0.46747  | c...1.....    | -0.84576 | -0.70789 | 2.24097  |
| F...(...F...  | 0.09098  | 1.11525  | 2.03365  | NNEOC...327-  | 0.44857  | -0.02887 | -0.71884 | PT4-C...17.. | 0.36354  | 0.27954  | 0.24983  | c...1...C...  | 0.16739  | 0.30507  | 0.20554  |
| F.....        | 1.152    | 0.24746  | 0.19111  | NNEOC...400-  | 2.24693  | 0.51396  | 2.23893  | PT4-C...2... | 0.17442  | 0.33558  | 2.16342  | c...1...N...  | 0.36159  | 0.04854  | 0.10081  |
| F...c...1...  | -0.09728 | 0.0051   | -0.70931 | NNEOC...427-  | 0.15258  | -0.49998 | 0.27901  | PT4-C...18.. | -0.07622 | 0.43944  | 0.23218  | c...1...O...  | 0.05096  | 0.45434  | 0.20975  |
| EC0-C...1...  | 0.1531   | -0.24547 | -0.77845 | NNEOC...436-  | 2.23904  | -0.95356 | -0.51509 | PT4-C...19.. | 0.38463  | 0.06249  | 1.85676  | c...1...c...  | 0.13001  | 0.10652  | -0.20118 |
| EC0-C...2...  | 2.23296  | 0.25736  | 2.13228  | NNEOF...109-  | -0.6351  | -0.69949 | 0.46634  | PT4-C...20.. | 2.3714   | 0.01694  | 2.47522  | c...2...(...  | 0.05797  | 0.27429  | -0.78645 |
| EC0-C...3...  | -0.63312 | -0.7726  | -0.47091 | NNE0Br...100- | -0.96941 | -0.11348 | -0.86235 | PT4-C...21.. | 0.01636  | 0.23208  | -0.247   | c...2.....    | 0.48584  | -0.07836 | 2.02182  |
| EC0-C...4...  | -1.8154  | -0.81627 | 1.83731  | NNE0Cl...109- | 0.18372  | 0.17389  | 2.19206  | PT4-C...22.. | -0.23446 | 0.13119  | 0.48307  | c...2...=...  | 0.25379  | 0.30424  | 0.22695  |
| EC0-F...1...  | 0.38793  | -0.73916 | 0.32177  | NNE0N...100-  | -0.80318 | -0.45752 | 0.28021  | PT4-C...24.. | 0.26973  | -0.53965 | -0.09164 | c...2...Cl... | 2.11886  | 2.48767  | 2.36215  |
| EC0-Br...1... | -0.34958 | -0.80174 | -0.90168 | NNE0N...109-  | -0.83559 | 0.35455  | 0.0206   | PT4-C...25.. | 2.17928  | -0.12469 | -0.74503 | c...2...c...  | 1.40592  | 1.55829  | 2.05199  |
| EC0-Cl...1... | 0.26043  | 2.23316  | 2.21212  | NNE0N...200-  | 1.34899  | 2.28282  | 2.43439  | PT4-C...3... | 1.99214  | 2.40479  | -0.56618 | c...3...(...  | 0.06076  | 0.90611  | -0.6936  |
| EC0-N...1...  | 0.49324  | -0.87888 | 0.40049  | NNE0N...209-  | 0.009    | 0.39312  | -0.85573 | PT4-C...4... | 1.13933  | 0.03684  | 2.2256   | c...3.....    | -0.06552 | -0.9892  | 0.08731  |
| EC0-N...2...  | -0.52908 | 0.40746  | 0.18437  | NNE0N...218-  | 0.02276  | 0.52399  | 2.13104  | PT4-C...5... | -1.04995 | -0.61142 | -2.61617 | c...3...c...  | -0.55897 | 0.07795  | 0.06945  |
| EC0-N...3...  | -1.01916 | -0.03247 | 1.79208  | NNE0N...309-  | 1.55866  | -0.1332  | -0.37739 | PT4-C...6... | 1.39341  | 0.27457  | -0.05959 | c...=.....    | 0.2537   | 0.47788  | 0.49889  |
| EC0-O...1...  | -0.92155 | -0.67765 | -0.87997 | NNE0N...318-  | -0.18673 | -0.80153 | -0.06489 | PT4-C...7... | 0.17292  | 1.06074  | 0.26559  | c...=...N...  | 0.19769  | -0.66864 | 0.27929  |
| EC0-O...2...  | -0.86981 | 0.22862  | 2.35716  | NNE0N...327-  | 0.28417  | 0.15478  | 0.43525  | PT4-C...8... | 0.29601  | 0.30338  | -0.60323 | c...C...(...  | -0.23827 | 2.01716  | 1.68518  |
| EC0-S...4...  | 1.06947  | -0.79758 | 0.1354   | NNE0O...100-  | 0.4907   | 0.19715  | 0.08214  | PT4-C...9... | 2.00248  | 0.4119   | 2.68775  | c...C.....    | 2.22333  | 0.36062  | 2.05477  |
| EC0-o...2...  | 2.13513  | 0.3829   | 2.45378  | NNE0O...109-  | -0.59596 | -1.18051 | -0.58622 | PT4-F...17.. | 0.16264  | -0.94288 | -0.88286 | c...C...1...  | 0.12218  | -0.22607 | -0.2383  |
| EC0-s...2...  | -0.01819 | 0.43769  | -0.06105 | NNE0O...218-  | -0.98042 | 0.13465  | 2.14414  | PT4-F...2... | -0.85722 | -0.96742 | 0.07513  | c...C...C...  | 0.06055  | -0.31014 | 0.44015  |
| H.....        | 0.23229  | -0.0546  | 0.28908  | NNE0S...409-  | 0.43544  | -0.38037 | -0.88913 | PT4-F...4... | -0.35181 | 2.13037  | -0.23636 | c...F.....    | 0.34773  | -0.88323 | -0.74301 |

|              |          |          |          |              |          |          |          |              |          |          |          |              |          |          |          |
|--------------|----------|----------|----------|--------------|----------|----------|----------|--------------|----------|----------|----------|--------------|----------|----------|----------|
| H...[...2... | -1.86843 | -0.10128 | 1.69945  | NNE0o...218- | 2.40415  | 1.58007  | 2.17219  | PT4-F...5... | 0.23527  | -0.94556 | 0.02251  | c...Cl.....  | 0.3638   | 0.98209  | 0.46919  |
| Br..(.....   | 0.48079  | -1.18479 | -0.22349 | NNE0s...209- | -0.26647 | 0.77009  | -0.93241 | PT4-F...8... | 0.27782  | 1.1436   | 0.54611  | c...N...(... | -1.01708 | 0.13434  | 0.13576  |
| Br.....      | -1.29212 | -0.96051 | -0.08624 | NNE0s...218- | 0.48799  | -0.92109 | 0.08824  | PT4-Br..8... | -0.68945 | -0.44919 | 0.39977  | c...N.....   | -1.11674 | -0.34213 | -0.61079 |
| Cl..(...(... | 0.12882  | -0.05669 | 2.00894  | NOSP01000000 | 0.69355  | 2.2604   | 3.67548  | PT4-Cl..2... | 2.77031  | 0.69825  | 0.29226  | c...N...=... | -0.89514 | 0.57778  | 2.48047  |
| Cl..(.....   | -0.76812 | 2.19447  | 0.02542  | NOSP10000000 | -3.86395 | -2.32737 | -3.57245 | PT4-Cl..4... | 0.17285  | 0.187    | -0.19396 | c...O...(... | -0.68651 | 0.30096  | 0.09369  |
| Cl..(..1...  | 2.56646  | 0.09187  | 0.58522  | NOSP11000000 | -0.96156 | 0.05503  | 0.43511  | PT4-Cl..5... | 1.01445  | -0.8606  | 1.32509  | c...O.....   | -4.4891  | -1.77794 | -4.57051 |
| Cl..(..C...  | -0.19283 | 0.81579  | -1.08229 | NOSP11100000 | 0.25443  | -0.61999 | -0.56449 | PT4-N...1... | -0.74846 | 0.11784  | -0.40604 | c...O...C... | -0.35817 | 0.07334  | -0.75285 |
| Cl..(..Cl..  | 2.1219   | 0.35966  | 2.06911  | S...(.....   | 0.03     | 0.15688  | 0.11096  | PT4-N...10.. | -0.93246 | 0.23828  | 0.35363  | c...[.....   | 2.10877  | -0.11899 | 0.15261  |
| Cl.....      | 2.24905  | 2.23591  | 0.45911  | S...(..1...  | 0.28735  | -0.2473  | -0.98364 | PT4-N...11.. | -1.31385 | 0.7013   | -0.62835 | c...c...(... | 0.18143  | 0.47407  | -0.74955 |
| Cl..2.....   | 2.24474  | 0.64454  | 0.24622  | S...(..2...  | -0.85261 | -0.41388 | 0.02192  | PT4-N...12.. | 1.43096  | -0.73105 | -0.07674 | c...c.....   | 0.29466  | 0.00755  | 0.21636  |
| Cl..c...1... | 2.43857  | 1.88477  | 2.1353   | S...(..=...  | 0.45053  | 0.00647  | 0.49728  | PT4-N...13.. | -0.92395 | 0.36236  | 0.19211  | c...c...1... | -0.73075 | 1.40562  | -0.5987  |
| Cmax.1.....  | 3.96897  | 1.5883   | 2.43778  | S...(..C...  | -0.99744 | 0.28391  | 0.3741   | PT4-N...14.. | 0.35328  | -0.31741 | -0.69679 | c...c...2... | 2.10322  | 2.04984  | -0.6361  |
| Cmax.2.....  | 2.04493  | 0.49477  | 2.32662  | S...(..F...  | -0.31012 | 0.14915  | -0.09756 | PT4-N...15.. | 0.60607  | 1.21863  | 2.15923  | c...c...3... | 0.42177  | 0.22771  | -0.04625 |
| Cmax.3.....  | -0.81812 | 0.15524  | -1.00546 | S...(..Cl..  | -0.98941 | 0.35685  | 2.19665  | PT4-N...16.. | -0.00847 | 0.28332  | 0.49334  | c...c...[... | -0.60049 | 0.18941  | 0.45452  |
| HALO00000000 | -0.7146  | -0.05095 | 2.02724  | S.....       | -0.54618 | 0.28476  | -0.1144  | PT4-N...2... | -0.28191 | -0.08045 | 0.03124  | c...c...c... | 2.38658  | 2.03972  | -0.14827 |
| HALO00100000 | 0.30447  | 0.29506  | -0.74387 | S...=.....   | -0.76276 | -0.59939 | -1.74529 | PT4-N...18.. | -0.5553  | 0.01363  | 1.20508  | c...n...1... | 2.34275  | -0.05757 | -0.85846 |
| HALO01000000 | 0.31657  | 1.4348   | 2.24296  | S...=...O... | -0.58871 | -0.72443 | -0.76909 | PT4-N...23.. | 0.17981  | 0.04282  | 2.04369  | c...n...2... | 0.0567   | -0.65144 | 0.42208  |
| HALO10000000 | 0.15215  | 0.50422  | 0.19177  | S...N.....   | 4.04473  | 2.57595  | 2.27636  | PT4-N...3... | -1.54905 | -0.92011 | -1.99161 | c...n...c... | 0.50033  | -0.09799 | -0.73447 |
| N...(.....   | -0.98213 | -0.43118 | -0.74526 | S...N...C... | 2.00984  | 2.17684  | 2.40769  | PT4-N...4... | 0.16895  | -0.58029 | 0.92841  | c...o...1... | 0.58602  | 0.33237  | 2.46204  |
| N...(..1...  | -0.73573 | 0.19138  | -1.66626 | S2E0C...0-.. | -0.73359 | -0.5248  | 0.19216  | PT4-N...5... | 0.48893  | 0.04423  | 0.14851  | c...s...(... | 1.41242  | 2.42007  | 2.14644  |
| N...(..C...  | -0.16151 | -0.69959 | -1.11224 | S2E0C...1-.. | 2.15113  | 0.2877   | 1.97429  | PT4-N...6... | -0.72108 | -0.80907 | -1.54523 | c...s...1... | -0.13541 | -0.86024 | -0.87466 |
| N...(..Br..  | -0.71201 | -0.17824 | -0.89366 | S2E0C...10-. | 0.49906  | -0.78935 | 0.32473  | PT4-N...7... | -0.75736 | 0.26704  | -0.72268 | n...(.....   | 0.28813  | -0.77834 | 0.46756  |
| N...(..Cl..  | -1.10752 | -1.23234 | -0.69452 | S2E0C...11-. | -0.28542 | 0.12827  | -0.60342 | PT4-N...8... | 0.19611  | 0.16111  | -0.62782 | n...(..1...  | 0.06525  | -0.59211 | 0.29214  |
| N...+.....   | 3.16015  | -0.51411 | -0.5429  | S2E0C...12-. | 0.89961  | 0.38099  | -0.30088 | PT4-N...9... | 0.2813   | 0.4231   | 0.23066  | n...(..C...  | 0.16693  | -0.88399 | 0.28242  |
| N.....       | -0.54824 | -0.63407 | -0.58104 | S2E0C...13-. | 0.12725  | -0.06893 | 0.26187  | PT4-O...1... | 0.26183  | -0.92006 | -0.69661 | n...(..c...  | 0.00941  | 0.01508  | 0.46693  |
| N...1.....   | 0.8894   | 0.42028  | 0.35541  | S2E0C...14-. | -0.00453 | -0.37356 | 1.42629  | PT4-O...10.. | 2.35144  | 0.21096  | -0.0059  | n.....       | 0.4575   | 0.17876  | -0.17955 |
| N...1...C... | -0.79109 | 0.0528   | 0.09087  | S2E0C...2-.. | 0.32428  | -0.58822 | -0.5034  | PT4-O...12.. | 0.08583  | -0.17191 | -1.36991 | n...1.....   | -0.94463 | 0.05721  | -0.60436 |
| N...2.....   | -0.84924 | -0.60611 | -0.65611 | S2E0C...3-.. | 0.40489  | 0.19081  | -0.67242 | PT4-O...13.. | 0.2836   | 0.3599   | -0.79216 | n...1...C... | 0.28986  | 0.2403   | 0.41335  |
| N...2...C... | -0.73041 | -0.98743 | 0.88434  | S2E0C...4-.. | 0.27431  | 0.1603   | -0.64726 | PT4-O...16.. | 0.1205   | 2.46834  | -0.76365 | n...1...c... | 0.04809  | 0.2972   | 0.44477  |
| N...3...(... | -0.63823 | 0.34296  | -0.52578 | S2E0C...5-.. | 0.37647  | 2.01944  | 0.26899  | PT4-O...17.. | 0.33138  | 0.35309  | 0.14275  | n...1...n... | 0.20482  | -0.46933 | -0.76917 |
| N...3.....   | 0.46444  | -0.63348 | 0.38401  | S2E0C...6-.. | 0.42791  | 0.60321  | 2.36668  | PT4-O...2... | 0.4262   | 0.01935  | -0.3871  | n...2...(... | 1.78882  | 0.14691  | -0.96149 |
| N...3...C... | -0.68855 | -0.96999 | -0.09593 | S2E0C...7-.. | 0.7445   | -0.06783 | 0.09719  | PT4-O...3... | -0.16899 | -0.62538 | -2.83432 | n...2.....   | 0.81075  | 2.38662  | -0.49785 |
| N...=.....   | -0.58571 | 0.30395  | -0.77591 | S2E0C...8-.. | 2.05445  | 0.47146  | 1.27482  | PT4-O...4... | 0.13171  | -0.05053 | -0.53118 | n...2...c... | -1.43426 | -0.74927 | -0.98687 |
| N...=...1... | 0.01826  | 0.47723  | 2.07009  | S2E0C...9-.. | 0.72539  | -0.84867 | 0.64405  | PT4-O...5... | -0.43913 | -0.75735 | -1.97766 | n...3.....   | 0.1576   | -0.26927 | 0.25977  |
| N...=...2... | -0.91192 | 2.47375  | -0.9808  | S2E0F...3-.. | -0.09403 | 2.09555  | 2.43903  | PT4-O...6... | 2.14377  | 0.22792  | -0.5518  | n...3...c... | -1.81039 | -0.81147 | -0.65304 |

|              |          |          |          |               |          |          |          |              |          |          |          |              |          |          |          |
|--------------|----------|----------|----------|---------------|----------|----------|----------|--------------|----------|----------|----------|--------------|----------|----------|----------|
| N...C...(... | 0.01411  | 0.41735  | 2.44216  | S2E0F...4-..  | -0.42171 | -0.53968 | 1.22683  | PT4-O...8... | 0.6644   | 0.29318  | 2.36116  | n...C.....   | 1.02189  | -0.97424 | -0.93995 |
| N...C.....   | 0.18303  | -0.75833 | -0.54585 | S2E0F...5-..  | -0.68133 | 0.56812  | -0.70322 | PT4-O...9... | 0.34854  | 0.29352  | -0.88037 | n...C...C... | -0.82773 | 0.17539  | 0.09117  |
| N...C...1... | 1.18224  | 1.15252  | 0.11132  | S2E0F...9-..  | -0.45558 | -0.74241 | 0.6498   | PT4-S...2... | 0.13977  | 0.34717  | 0.338    | n...H.....   | 0.15952  | -0.63695 | 0.00967  |
| N...C...C... | -0.99504 | 0.30907  | -0.76519 | S2E0Br...5-.. | -0.30676 | 0.24666  | -0.40556 | PT4-S...6... | -1.18884 | 0.19     | -1.86095 | n...H...[... | 2.02601  | -0.94357 | 1.70404  |
| N...S...(... | 1.76899  | 2.61791  | 2.63934  | S2E0Cl...3-.. | 1.31385  | 1.19854  | 2.0981   | PT4-o...13.. | 2.35863  | 0.19809  | 0.77903  | n...[.....   | 0.05557  | -1.09898 | 0.37211  |
| N...c...1... | -1.32191 | 0.12661  | -0.8796  | S2E0Cl...4-.. | -0.78187 | -1.52933 | 1.5693   | PT4-s...12.. | 0.17607  | -0.93961 | -0.06524 | n...[...c... | -0.14457 | -0.92874 | -1.10231 |
| O...(...     | -0.52341 | 0.26602  | 2.29637  | S2E0N...1-..  | 0.25085  | 2.15343  | 0.04602  | PT4-s...14.. | 0.25166  | 0.27855  | 0.03999  | n...c...(... | -0.82798 | -0.61881 | 0.06095  |
| O...(.....   | -0.52586 | -0.39601 | -0.63779 | S2E0N...10-.. | -1.21878 | -0.80358 | 0.33984  | PT4-s...15.. | -0.08379 | 0.02761  | -0.968   | n...c.....   | -0.55416 | 0.01662  | 1.9503   |
| O...(...1... | 0.48508  | -1.32985 | -0.71987 | S2E0N...11-.. | 0.15357  | 0.11468  | 2.33164  | PT4-s...6... | 0.49943  | 0.03813  | 2.43373  | n...c...1... | 1.25184  | 0.32134  | 2.17753  |
| O...(...2... | 0.2826   | 0.14065  | -0.55389 | S2E0N...2-..  | 0.29108  | -0.63473 | -0.27501 | PT4-s...9... | 0.2372   | -0.32296 | -0.46931 | n...c...2... | 0.32311  | 0.18498  | 0.58804  |
| O...(...C... | -0.51582 | -0.98786 | -0.5871  | S2E0N...3-..  | 0.15907  | 0.18969  | 2.03791  | Nmax.0.....  | -0.9234  | 1.38661  | 0.04236  | n...c...c... | 0.41251  | -0.78184 | 2.08239  |
| O...(...N... | -0.81738 | -0.99472 | -0.69132 | S2E0N...4-..  | 1.05339  | 1.54638  | -0.66466 | Nmax.1.....  | 1.38641  | 0.41952  | -0.75135 | n...c...n... | -0.66901 | 0.32885  | 3.42654  |
| O...(...O... | 0.46016  | 0.11023  | 1.33529  | S2E0N...5-..  | 1.12581  | 2.20028  | -0.98431 | Nmax.2.....  | -0.12645 | -0.7017  | -0.75869 | n...n...(... | -0.72211 | 2.71273  | 0.29177  |
| O...-.....   | 0.16235  | -0.85863 | 0.44675  | S2E0N...6-..  | 0.03234  | 0.12178  | 0.1397   | Nmax.3.....  | 0.67479  | -0.44966 | 0.07735  | n...n.....   | -0.54765 | 0.43715  | 2.0837   |
| O.....       | -1.25961 | -0.32181 | -0.55125 | S2E0N...7-..  | -2.51138 | -1.0895  | -0.23354 | Nmax.4.....  | -0.56908 | -0.57795 | -0.77003 | n...n...1... | 0.3625   | -0.51506 | -0.44598 |
| O...1.....   | -0.45431 | 0.71467  | -0.76434 | S2E0N...8-..  | -0.97985 | 0.09852  | -0.99536 | Omax.0.....  | -0.2616  | 0.25178  | -0.74982 | n...n...2... | 0.74054  | -0.08303 | 2.47641  |
| O...1...C... | -0.73726 | -0.82182 | 2.26821  | S2E0N...9-..  | -0.83898 | 2.14709  | 0.17445  | Omax.1.....  | 0.48225  | -0.09916 | -0.81615 | n...n...c... | 0.48285  | -0.99433 | 0.24124  |
| O...2.....   | -0.75627 | -0.0241  | -0.52757 | S2E0O...0-..  | 2.20918  | 2.1148   | 0.16181  | Omax.2.....  | 2.36141  | 0.00555  | 0.2832   | n...s...1... | 0.20567  | -1.05538 | -0.49937 |
| O...2...3... | -0.77527 | 0.62546  | -0.09644 | S2E0O...1-..  | -2.72368 | -0.86438 | -3.40428 | Omax.3.....  | 0.50047  | 0.31377  | 0.45135  | n...s...c... | 2.03815  | 0.3696   | 0.67301  |
| O...=...(... | -0.66784 | 0.08794  | -0.71271 | S2E0O...11-.. | -0.44371 | 0.35183  | -0.2497  | Omax.4.....  | -1.71576 | -0.9249  | -0.65231 | o.....       | 0.58687  | 0.32538  | 2.25268  |
| O...=.....   | 0.4887   | -0.64317 | -0.48616 | S2E0O...2-..  | -0.56127 | 2.21649  | 0.41584  | Omax.5.....  | -0.69226 | -0.82128 | 0.27583  | o...1.....   | -1.41704 | 2.38201  | 1.77605  |
| O...=...2... | -0.94348 | -0.83997 | 0.16894  | S2E0O...3-..  | 0.45322  | -0.85291 | -0.68519 | VS2-C...10.. | 0.01544  | 0.46572  | 0.00187  | o...1...c... | 2.10296  | 2.63377  | 0.23094  |
| O...=...C... | 0.21476  | 0.09464  | -0.94441 | S2E0O...4-..  | 0.09143  | -0.53168 | -0.19205 | VS2-C...11.. | 0.26752  | 0.36169  | 0.08777  | o...c...(... | 0.48243  | 2.03019  | 0.46509  |
| O...C...(... | 0.46772  | -0.91689 | -0.66502 | S2E0O...5-..  | 0.08068  | -0.74203 | -0.88773 | VS2-C...12.. | 0.49761  | -0.8906  | 0.11889  | o...c.....   | 0.28104  | -0.74801 | 0.3194   |
| O...C.....   | 0.29752  | -0.04126 | 2.17112  | S2E0O...6-..  | 0.38467  | 0.24995  | 0.18108  | VS2-C...13.. | -0.9202  | 0.31722  | 0.85729  | s...(.....   | -0.62742 | 0.6903   | -0.35019 |
| O...C...C... | 0.37916  | 0.32285  | 2.10383  | S2E0O...7-..  | 0.78233  | -0.91691 | -0.36489 | VS2-C...14.. | -0.17537 | 0.35764  | -0.94554 | s...(...1... | 2.13886  | 0.46449  | 2.23479  |
| O...C...O... | 0.10613  | -0.74936 | -0.70609 | S2E0O...8-..  | -1.18507 | 1.87923  | 2.34376  | VS2-C...15.. | 2.45706  | 0.13899  | -0.77128 | s...(...c... | -0.48347 | -0.9438  | 0.27686  |
| O...c...1... | -0.60562 | -0.07472 | -2.44684 | S2E0O...9-..  | 0.14783  | 1.1461   | 0.28386  | VS2-C...16.. | 0.03779  | 0.05445  | 0.16203  | s.....       | 0.12998  | 0.40334  | 0.15193  |
| O...c...2... | -0.34014 | 0.33535  | 0.32105  | S2E0S...0-..  | 0.39132  | 0.35941  | 0.62512  | VS2-C...17.. | -0.93189 | 1.73812  | 2.59296  | s...1...(... | -0.52863 | 0.25682  | 0.15824  |
| P2E0C...0-.. | 2.31094  | -0.87654 | 0.25368  | S2E0S...1-..  | 0.17627  | 1.04204  | 0.07999  | VS2-C...18.. | 0.43012  | 0.25189  | 0.37868  | s...1.....   | -0.85328 | 0.2643   | 0.13666  |
| P2E0C...1-.. | 0.12128  | 2.05827  | -0.91189 | S2E0S...3-..  | -0.92183 | 0.30118  | -0.56522 | VS2-C...2... | 0.42671  | 0.13335  | -0.82878 | s...1...c... | 0.23583  | 0.0517   | -1.18805 |
| P2E0C...2-.. | 0.06568  | -0.64468 | -0.90313 | S2E0s...9-..  | 2.58245  | 0.32939  | 0.47675  | VS2-C...3... | -0.76503 | -0.73709 | 0.43779  | s...2...(... | 2.40492  | -1.19031 | 1.38326  |
| P2E0C...3-.. | 0.39576  | 0.27302  | 0.11615  | S2E0s...5-..  | 1.91179  | 2.20513  | 0.068    | VS2-C...4... | 0.15362  | 0.17834  | 2.45033  | s...2.....   | 0.28131  | -0.41007 | -1.11995 |
| P2E0C...4-.. | 1.88206  | -0.67798 | 2.10352  | S2E0s...6-..  | -1.9943  | -1.55681 | 0.66099  | VS2-C...5... | 0.01704  | 0.42202  | 0.03643  | s...c...(... | 0.48126  | 0.3056   | 0.0661   |
| P2E0F...1-.. | 4.30074  | 0.123    | 2.53355  | S2E0s...8-..  | -0.96886 | -0.82281 | 0.52882  | VS2-C...6... | -0.01596 | 0.20034  | 0.29228  | s...c.....   | 2.09512  | 0.11647  | 0.39705  |

|              |          |          |          |               |          |          |          |              |         |         |          |              |          |          |          |
|--------------|----------|----------|----------|---------------|----------|----------|----------|--------------|---------|---------|----------|--------------|----------|----------|----------|
| P2E0F...2-.. | -0.28854 | 2.35994  | -0.01594 | S2E0s...9-..  | 0.19986  | -0.77129 | 0.4668   | VS2-C...7... | 0.11826 | 0.49452 | 2.45151  | s...c...1... | 2.14398  | 0.39304  | 2.90501  |
| P2E0Br..1-.. | -1.3762  | -0.8884  | -0.71148 | S3E0C...0-..  | 2.48867  | -0.39634 | -0.82467 | VS2-C...8... | 0.18354 | 0.08114 | 0.14307  | s...c...2... | 2.22247  | 0.30418  | 4.35731  |
| P2E0Cl..1-.. | 1.25652  | 0.57676  | 2.86634  | S3E0C...1-..  | 2.07158  | 2.13726  | -0.07162 | VS2-C...9... | 0.23178 | 0.27463 | 0.18505  | s...c...n... | 0.13586  | -0.12247 | 0.11923  |
| P2E0Cl..2-.. | -0.38335 | -0.04562 | 2.27669  | S3E0C...10-.. | 0.05045  | -0.61465 | 0.30906  | VS2-F...10.. | 2.1349  | 0.24968 | 0.49617  | s...n...(... | 2.21466  | 1.96561  | 0.37126  |
| P2E0N...0-.. | -0.29764 | 0.02209  | -0.49053 | S3E0C...11-.. | 0.16844  | 0.08131  | -0.8326  | VS2-F...4... | 0.44264 | 0.88576 | -0.58854 | s...n.....   | 0.44911  | -0.99348 | -0.66839 |
| P2E0N...1-.. | -0.79136 | 0.48295  | -0.67309 | S3E0C...12-.. | 0.12831  | -0.67711 | 0.12789  | VS2-F...5... | 1.17514 | 1.32373 | 2.13681  | s...n...c... | -0.68496 | 0.38243  | 1.43116  |
| P2E0N...2-.. | -0.64336 | -0.75617 | 1.12684  | S3E0C...13-.. | -0.99987 | 0.18875  | -0.12138 | VS2-F...6... | 1.20755 | 0.97866 | 1.67693  | s...n...n... | 0.85497  | 0.41493  | 2.26696  |
